# Supplementary material for: Mitochondrial DNA Copy Number Is Increased in Plasma and Associated with Postoperative Complications After Coronary Artery Bypass Grafting
Source: Research Square preprint supplement (doi:10.21203/rs.3.rs-7999546/v1), 2025-12-08
Supplement: Supplementary file 1 [file c3aa59110c09c6114ff20d01.docx]

Table S1. Baseline demographic and clinical characteristics of patients before CABG

| **Parametrs** | **n=26** |
| --- | --- |
| Age, years | 67 (58; 71) |
| Gender: male; n (%) | 24 (92.3) |
| Angina; n(%) | 26 (100) |
| Acute decompensated heart failure in the last 12 months, n (%) | 6 (23.1) |
| Shortness of breath, n (%) | 26 (100) |
| Edema; n (%) | 2 (7.7) |
| Liver enlargement; n (%) | 1 (3.8) |
| Moist rales; n (%) | 2 (7.7) |
| History of myocardial infarction; n (%) | 21 (80.8) |
| NYHA class heart failure | 2 (2; 3) |
| Hypertension ; n(%) | 26 (100) |
| Stroke; n (%) | 2 (7.7) |
| Atrial fibrillation; n (%) | 5 (19.2) |
| Current smoker; n (%) | 12 (46.2) |
| Obesity; n (%) | 12 (46.2) |
| Systolic blood pressure, mm Hg | 130 (130; 140) |
| Diastolic blood pressure, mm Hg | 80 (74; 82) |
| Heart rate, b.p.m | 68 (61; 75) |
| Left ventricular ejection fraction, % | 44 (32; 46) |
| NTproBNP, pg/ml | 142 (74; 298) |
| Renin-angiotensin-aldosterone inhibitors, % | 25 (96.2) |
| Beta blockers, % | 22 (84.6) |
| Mineralocorticoid receptor antagonists, % | 17 (65.4) |
| Sodium glucose cotransporter type 2 inhibitors, n (%) | 18 (69.2) |
| Diuretics, n (%) | 20 (77) |
| Statins, n (%) | 26 (100) |

Table S2. Complications after CABG surgery in the study cohort

| **Parametrs** | **n=26** |
| --- | --- |
| Infectious complications, n (%) | 10 (38.5) |
| Acute kidney injury, n (%) | 1 (3.8) |
| Post-pericardiotomy syndrome, n (%) | 8 (30.7) |
| Myocardial infarction, n (%) | 1(3.8) |
| Imaging-confirmed stroke, n (%) | 1 (3.8) |
| Newly diagnosed atrial fibrillation, n (%) | 6 (23.1) |
| Any complications | 17 (65.4) |

Table S3. Baseline demographic and clinical characteristics of patients with and without complications

| **Parametrs** | Without complications  (n=9) | With complications  (n=17) | **р** |
| --- | --- | --- | --- |
| Age, years | 66 (51.5; 70) | 68 (58; 71) | 0.426 |
| Gender: male; n (%) | 9 (100) | 15 (88.2) | 0.529 |
| Angina; n(%) | 9 (100) | 17 (100) | 1.0 |
| Acute decompensated heart failure in the last 12 months, n (%) | 2 (22.2) | 4 (23.5) | 0.940 |
| Shortness of breath, n (%) | 9 (100) | 17 (100) | 1.0 |
| Edema; n (%) | 0 | 2 (11.8) | 0.285 |
| Liver enlargement; n (%) | 0 | 1 (5.9) | 0.459 |
| Moist rales; n (%) | 0 | 2 (11.8) | 0.285 |
| History of myocardial infarction; n (%) | 7 (77.8) | 14 (82.4) | 0.778 |
| NYHA class heart failure | 2 (2; 3) | 2 (2; 3) | 0.934 |
| Hypertension ; n(%) | 9 (100) | 17 (100) | 1.0 |
| Stroke; n (%) | 0 | 2 (11.8) | 0.285 |
| Atrial fibrillation; n (%) | 2 (22.2) | 3 (17.7) | 0.779 |
| Current smoker; n (%) | 6 (66.7) | 6 (35.3) | 0.369 |
| Obesity; n (%) | 4 (44.4) | 8 (47) | 0.790 |
| Systolic blood pressure, mm Hg | 130 (130; 140) | 130 (120; 140) | 0.522 |
| Diastolic blood pressure, mm Hg | 80 (78; 82) | 80 (80; 84) | 0.678 |
| Heart rate, b.p.m | 68 (61; 81.5) | 67.5 (60.5; 75) | 0.677 |
| Left ventricular ejection fraction, % | 39 (30; 49) | 44.5 (34; 49.5) | 0.846 |
| NTproBNP, pg/ml | 129 (36.5; 223) | 155 (75; 316) | 0.445 |
| Renin-angiotensin-aldosterone inhibitors, % | 8 (88.9) | 17 (100) | 0.162 |
| Beta blockers, % | 8 (88.9) | 14 (82.4) | 0.661 |
| Mineralocorticoid receptor antagonists, % | 6 (66.7) | 11 (64.7) | 0.921 |
| Sodium glucose cotransporter type 2 inhibitors, n (%) | 6 (66.7) | 12 (70.6) | 0.837) |
| Diuretics, n (%) | 6 (66.7) | 14 (87.5) | 0.367 |
| Statins, n (%) | 9 (100) | 17 (100) | 1.0 |
| SYNTAX score | 25.5 (19; 30) | 31 (24; 43) | 0.147 |
| On-pump time, min | 92 (89;104.5) | 97.5 (82.5;112.25) | 0,755 |
| Aortic cross-clamp time, min | 56 (43.5; 66) | 47.5 (41; 59.25) | 0,243 |
| Number of bypass grafts, n (%)  2  3  4 | 3 (33.3)  5 (55.6)  1 (11.1) | 4 (23.5)  10 (58.8)  3 (17.7) | 0,733 |
